# Supplementary material for: SaDA: From Sampling to Data Analysis—An Extensible Open Source Infrastructure for Rapid, Robust and Automated Management and Analysis of Modern Ecological High-Throughput Microarray Data
Source: Int J Environ Res Public Health. 2015 Jun 3;12(6):6352–66. doi: 10.3390/ijerph120606352 (PMC4483705; doi:10.3390/ijerph120606352)
Supplement: Supplementary file 1 [file ijerph-12-06352-s001.zip]

Archive with 7 entries (7 files):
- 1_Login.pdf
- 2_Sampling_sites.pdf
- 3_Samplings.pdf
- 4_Taxonomy_browser.pdf
- 5_Batch_upload.pdf
- 6_Microarray_experiment.pdf
- 7_Microarray_analysis.pdf
